# Supplementary material
Source: PubMed Central journal article supplement (PMC7223596)
Supplement: 11427_2020_1657_MOESM1_ESM.pdf [file 11427_2020_1657_MOESM1_ESM.pdf]

## Supplementary materials

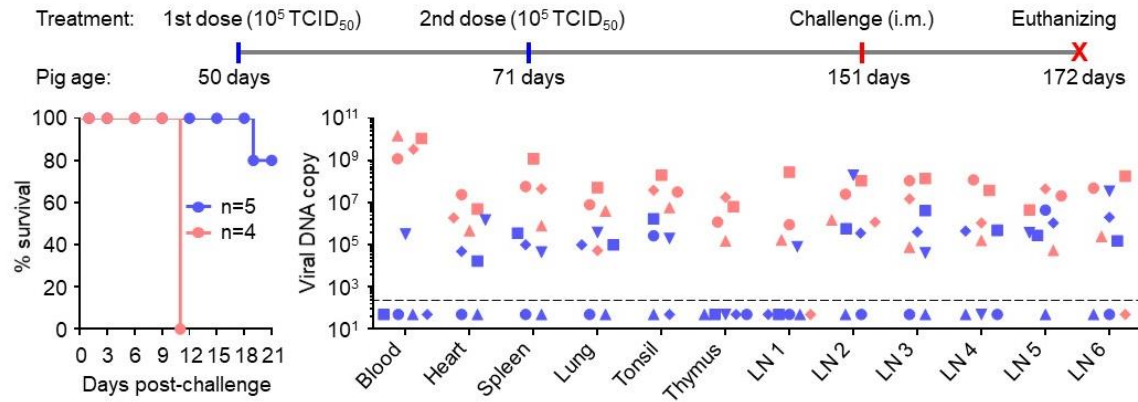

**Figure S1. Protective efficacy of long-lasting immunity induced by HLJ/18-7GD in commercial pigs.** Groups of clean commercial pigs were inoculated twice (with a 3-week interval) with  $10^5$  TCID<sub>50</sub> of LJJ/18-7GD vaccine, and then challenged with lethal HLJ/18 virus intramuscularly (i.m.) 80 days after the second vaccine dose; similar aged unvaccinated pigs were used as controls. Pigs were observed for 21 days post-challenge and then euthanized for the detection of the viral DNA of the challenging virus. The survival rates and viral DNA copies in the organs of pigs are shown in the panels. The dashed lines indicate the lower limit of detection.
